# Supplementary material
Source: PubMed Central journal article supplement (PMC8326877)

## Supplementary Materials

**Toro, et al.: “Longitudinal Stratification of Gene Expression Reveals Three SLE Groups of Disease Activity Progression”**

**Table S1. Bi-dimensional correlation matrices.** Sheet 1 of the Excel file contains the genes selected to stratify and their correlation values across patients of pediatric patients. Sheet 2 contains the genes selected to stratify and their correlation values across patients of adult patients.

**Table S2. Classification of patients into the clusters.** The Table contains the patient identifiers and the cluster to which they belong.

| Cluster           | Patients                                                                                                                                                                                                                                                                        |
|-------------------|---------------------------------------------------------------------------------------------------------------------------------------------------------------------------------------------------------------------------------------------------------------------------------|
| <b>Cluster P1</b> | SLE-281, SLE-144, SLE-192, SLE-163, SLE-202, SLE-182, SLE-178, SLE-189, SLE-55, SLE-79, SLE-60, SLE-183, SLE-180, SLE-123, SLE-188, SLE-179, SLE-242, SLE-170, SLE-224, SLE-327, SLE-225, SLE-110, SLE-169, SLE-172, SLE-133, SLE-34, SLE-90, SLE-129, SLE-99, SLE-125, SLE-241 |
| <b>Cluster P2</b> | SLE-197, SLE-168, SLE-308, SLE-201, SLE-200, SLE-155, SLE-143, SLE-325, SLE-212, SLE-175, SLE-256, SLE-254, SLE-176, SLE-40, SLE-331, SLE-264, SLE-78, SLE-304, SLE-152, SLE-199, SLE-234                                                                                       |
| <b>Cluster P3</b> | SLE-31, SLE-128, SLE-210, SLE-271, SLE-138, SLE-171, SLE-321, SLE-211, SLE-184, SLE-141, SLE-181, SLE-177, SLE-80, SLE-213, SLE-244, SLE-260, SLE-231, SLE-166, SLE-324, SLE-21, SLE-121, SLE-150, SLE-252, SLE-233, SLE-313, SLE-218, SLE-95, SLE-65                           |
| <b>Cluster A1</b> | 1206, 1409, 1463, 1679, 1764, 1792, 1869, 1871, 2020, 2122, 2129, 24, 371, 966, 981, 1480, 1335, 1520, 1944, 704                                                                                                                                                                |
| <b>Cluster A2</b> | 1436, 1842, 1041, 1227, 1702, 1913, 2016, 345, 699, 759, 1176, 113, 1620, 1705, 1924, 2067                                                                                                                                                                                      |
| <b>Cluster A3</b> | 1001, 1174, 1179, 1182, 1269, 1807, 458, 911, 1699, 2103, 1052, 1178, 1263, 1424, 1478, 1537, 1927, 1938, 2104, 2119, 2128, 2132, 244, 317, 365, 453, 46, 582, 725                                                                                                              |

**Table S3. Cluster stability results.** The table contains the different cluster validation approaches tested and the mean Jaccard coefficient obtained for each cluster and test. Number 1 represents complete or total stability. \*<sup>1</sup> In parenthesis, the number of visits; \*<sup>2</sup> In parenthesis, the percentage of patients. \*<sup>3</sup> The analysis was not performed because patients had less than three visits or time points. Global stability measures overall stability and it is calculated comparing the three clusters as one.

| Validation Approach                  | Cluster P1 stability | Cluster P2 stability | Cluster P3 stability | Global pediatric stability | Cluster A1 stability | Cluster A2 stability | Cluster A3 stability | Global adult stability |
|--------------------------------------|----------------------|----------------------|----------------------|----------------------------|----------------------|----------------------|----------------------|------------------------|
| Number of visits (5) * <sup>1</sup>  | 1                    | 1                    | 1                    | 1                          | * <sup>3</sup>       | * <sup>3</sup>       | * <sup>3</sup>       | * <sup>3</sup>         |
| Number of visits (4) * <sup>1</sup>  | 1                    | 1                    | 1                    | 1                          | * <sup>3</sup>       | * <sup>3</sup>       | * <sup>3</sup>       | * <sup>3</sup>         |
| Number of visits (3) * <sup>1</sup>  | 1                    | 1                    | 1                    | 1                          | * <sup>3</sup>       | * <sup>3</sup>       | * <sup>3</sup>       | * <sup>3</sup>         |
| Bootstrapping (75%) * <sup>2</sup>   | 0.89                 | 0.9                  | 0.95                 | 0.95                       | 0.947                | 0.813                | 0.971                | 0.8741                 |
| Bootstrapping (62.5%) * <sup>2</sup> | 0.83                 | 0.9                  | 0.94                 | 0.86                       | 0.905                | 0.767                | 0.865                | 0.827                  |

|                                    |      |      |      |      |       |     |       |       |
|------------------------------------|------|------|------|------|-------|-----|-------|-------|
| Bootstrapping (50%) * <sup>2</sup> | 0.77 | 0.89 | 0.87 | 0.81 | 0.879 | 0.7 | 0.957 | 0.779 |
|------------------------------------|------|------|------|------|-------|-----|-------|-------|

**Table S4. Association among demographic variable and medication variables with the clusters.** The table contains the demographic variables with their p-values obtained by Fisher exact test comparing each cluster versus the rest. Each patient was considered once in any visit having a positive manifestation \* Marks no available information to perform the analysis.

| Categorical Variables |                         |           |           |           |            |            |            |
|-----------------------|-------------------------|-----------|-----------|-----------|------------|------------|------------|
| Clinical variable     | Category                | ClusterP1 | ClusterP2 | ClusterP3 | Cluster A1 | Cluster A2 | Cluster A3 |
| Gender                | Female/ Male            | 1         | 0.42      | 0.706     | 1          | 1          | 1          |
| Race                  | Caucasian, White        | 0.184     | 0.124     | 1         | 0.289      | 0.559      | 0.8035     |
|                       | Hispanic                | 0.061     | 0.601     | 0.158     | *          | *          | *          |
|                       | African-American, Black | 0.429     | 0.766     | 0.175     | 0.259      | 1          | 0.4319     |
| Treatment             | Steroids                | 0.71      | 0.287     | 0.17      | *          | *          | *          |
|                       | Cyclophosphamide        | 1         | 1         | 1         | *          | *          | *          |
|                       | Oral steroids           | 0.508     | 0.881     | 0.582     | *          | *          | *          |
|                       | Mycophenolate           | 1         | 0.631     | 0.654     | *          | *          | *          |
|                       | Hydrochloroquine        | 0.694     | 1         | 0.587     | *          | *          | *          |
|                       | Methotrexate            | 0.652     | 1         | 0.338     | *          | *          | *          |
|                       | NSAIDs                  | 0.831     | 0.342     | 0.823     | 0.816      | 1          | 1          |
|                       | Acetylsalicylicacid     | 0.103     | 0.269     | 0.61      | 1          | 0.506      | 0.724      |
|                       | Prednisone              | *         | *         | *         | 0.695      | 1          | 0.858      |
|                       | Immunosuppressors       | *         | *         | *         | 0.856      | 1          | 0.738      |
|                       | Cytotoxic medicine      | *         | *         | *         | 0.856      | 1          | 0.738      |
|                       | Plaquenil               | *         | *         | *         | 0.879      | 0.87       | 0.4        |
|                       | Anti-HTN                | *         | *         | *         | 0.746      | 1          | 0.765      |
|                       | Triam                   | *         | *         | *         | 1          | 0.506      | 0.724      |
|                       | Statin                  | *         | *         | *         | 0.825      | 0.1928     | 0.4106     |

**Table S5. Detailed clinical information.** This table shows the number of patients for each clinical variable.

|                    |                    | Cluster A1 | Cluster A2 | Cluster A3 | Cluster P1 | Cluster P2 | Cluster P3 |
|--------------------|--------------------|------------|------------|------------|------------|------------|------------|
| Gender             | Male               | 0          | 0          | 0          | 3          | 3          | 2          |
|                    | Female             | 20         | 16         | 28         | 28         | 18         | 26         |
| Race               | Asian              | 1          | 0          | 1          |            |            |            |
|                    | White              | 10         | 11         | 17         |            |            |            |
|                    | Black              | 9          | 5          | 8          |            |            |            |
|                    | Other              | 0          | 0          | 2          |            |            |            |
|                    | African-American   |            |            |            | 6          | 3          | 11         |
|                    | Hispanic           |            |            |            | 23         | 10         | 13         |
|                    | Caucasian          |            |            |            | 2          | 5          | 4          |
| Age Onset          | Mean               | 28.72      | 26.91      | 27.15      | 13.87      | 12.59      | 12.94      |
|                    | Standard deviation | 11.42      | 12.13      | 11.97      | 2.1        | 2.63       | 2.77       |
| Clinical variables | FEVER              | 3          | 8          | 12         |            |            |            |
|                    | LYMPHAD            | 6          | 10         | 13         |            |            |            |
|                    | PHOTO              | 10         | 7          | 18         |            |            |            |
|                    | LIVEDO             | 7          | 8          | 19         |            |            |            |
|                    | PERICA             | 7          | 2          | 7          |            |            |            |
|                    | PROTEINU           | 11         | 5          | 14         |            |            |            |
|                    | HEMATURI           | 8          | 5          | 8          |            |            |            |
|                    | INSUFF             | 6          | 3          | 3          |            |            |            |
|                    | DEPRESS            | 10         | 9          | 10         |            |            |            |
|                    | COOMBS             | 9          | 2          | 5          |            |            |            |
|                    | LYMPHCT            | 7          | 9          | 11         |            |            |            |
|                    | RVVT               | 5          | 7          | 13         |            |            |            |

|  |           |   |   |    |  |  |  |
|--|-----------|---|---|----|--|--|--|
|  | AntyB2Gly | 5 | 5 | 11 |  |  |  |
|  | SJOGREN   | 2 | 2 | 10 |  |  |  |
|  | FIBROSIS  | 2 | 5 | 1  |  |  |  |
|  | LFT_CUM   | 7 | 7 | 15 |  |  |  |

**Table S6. Mean values across clusters.** The table shows the mean values of SLEDAI and cell proportions across patients in each cluster, standard deviations are shown in parentheses. \* Marks no available information to perform the analysis.

|                              | Cluster P1    | Cluster P2    | Cluster P3    | Cluster A1   | Cluster A2   | Cluster A3   |
|------------------------------|---------------|---------------|---------------|--------------|--------------|--------------|
| <b>SLEDAI</b>                | 6.45 (5.02)   | 6.44 (5.29)   | 6.65 (6.45)   | 3.29 (3.46)  | 2.30 (2.81)  | 2.80 (3.13)  |
| <b>Neutrophil percentage</b> | 64.06 (13.44) | 65.62 (15.19) | 65.13 (14.61) | 49.41 (8.55) | 48.16 (8.73) | 47.71 (9.29) |
| <b>Lymphocyte percentage</b> | 25.21 (11.42) | 24.31 (12.26) | 23.83 (11.62) | *            | *            | *            |

## Supplementary figure legends

**Figure S1. Cell proportion and SLEDAI correlation overview.** A) and B) show the mean and standard deviations of neutrophil and lymphocyte percentages, respectively, for each SLEDAI value across the three clusters.

**Figure S2. Quality control of cell proportion imputation.** A) The picture shows the correlation between the real cellular proportions of pediatric patients and imputed cellular proportions in the same patients. B) Comparison of correlations between SLEDAI and real cell proportions in each patient across visits and correlations between SLEDAI and imputed cell proportions.

**Figure S3. Treatment related genes.** The picture shows the number of shared genes between genes selected to stratify in the two sets and the genes that best correlate with treatment doses. The treatment related genes were obtained in the same way as genes selected to stratify (see methods) but substituting the SLEDAI for the dose of each treatment. Only 2% of the genes were shared between the selected genes forming the clusters and those genes obtained with treatment doses.

**Figure S4. Cell proportion modulation by treatments.** The plot shows the tendencies of neutrophil proportions between each time point when a determinate treatment is applied and the next time point. The tendencies were calculated as the angle between percentage between the two points and the time difference. We normalized the time points in the plot to make comparable the tendencies of the different treatment applications.

**Figure S5. SLEDAI decomposition.** The plot represents the weight with which each component contributes to the SLEDAI score in each cluster. The pediatric clusters were divided into disease activity ranges.

**Figure S6. All significant modular functions in the two sets.** A) Significant modular functions for pediatric patient set. B) Significant modular functions for adult set.

Figure S7. Heat map showing the genes from the functional cytokine signaling group negatively or positively correlated in each of the clusters.

*R Packages Used in our analyses*

mclust: (<https://cran.r-project.org/web/packages/mclust/mclust.pdf>).

ConsensusClusterPlus:

(<https://bioconductor.org/packages/release/bioc/html/ConsensusClusterPlus.html>).

clusteval: (<https://cran.r-project.org/web/packages/clusteval/clusteval.pdf>).

limma: (<https://bioconductor.org/packages/release/bioc/html/limma.html>).

tmod: (<https://cran.r-project.org/web/packages/tmod/index.html>).

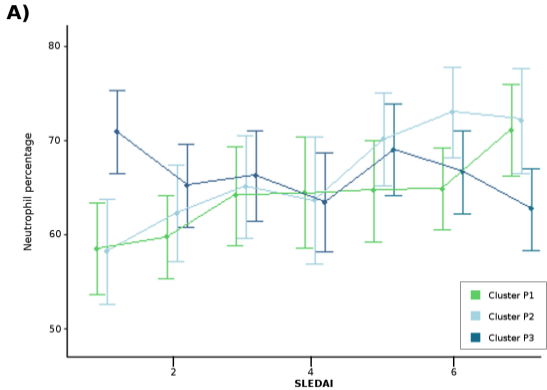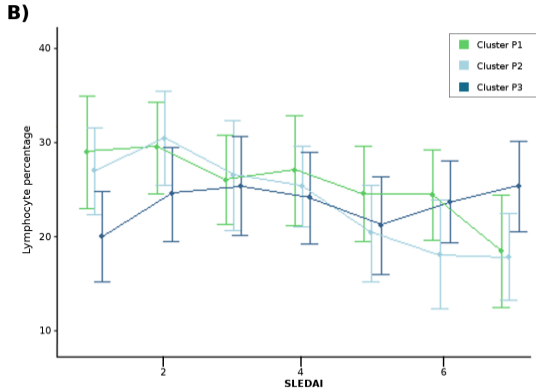

A

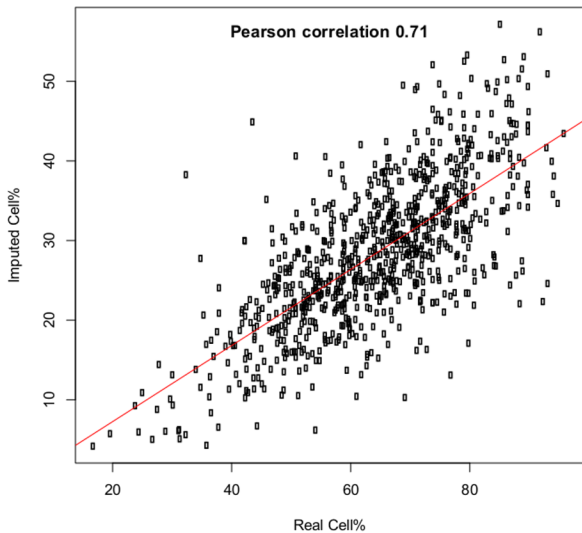

B

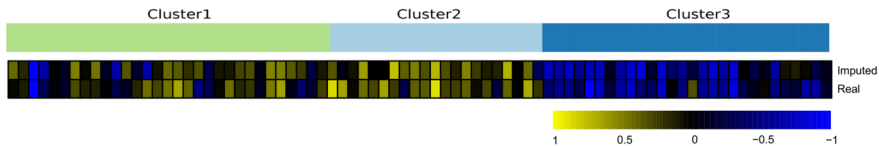

### Prednisone

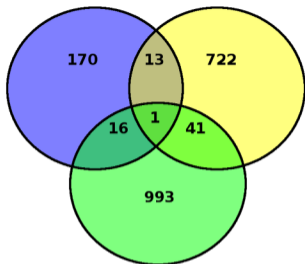

### Cytotoxic

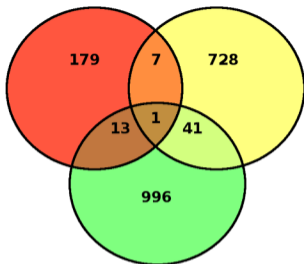

### ASA

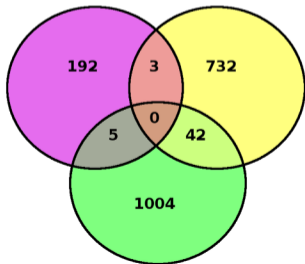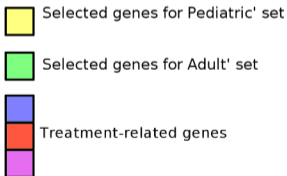

Cluster P1

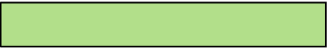

Cluster P2

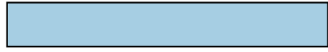

Cluster P3

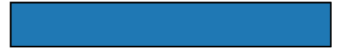

Acetylsalicylic acid

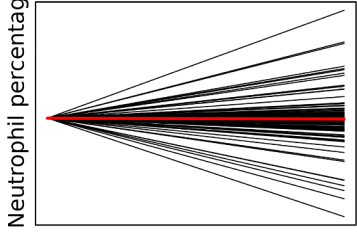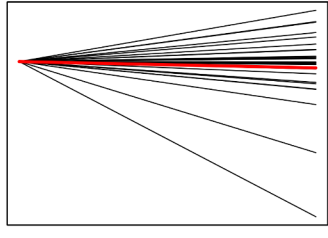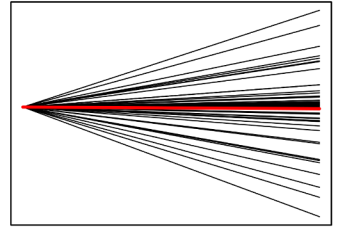

Time

Cytotoxic medicine

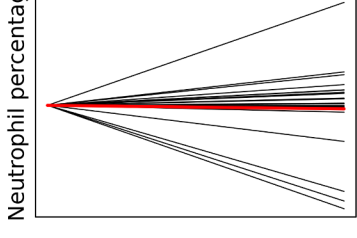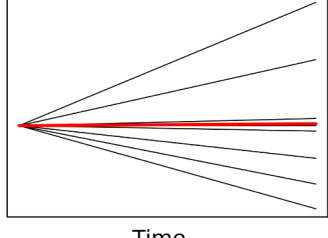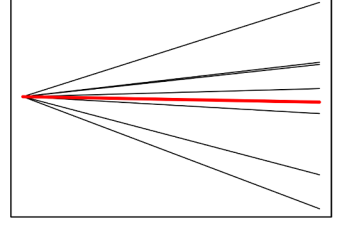

Time

Hydroxychloroquine

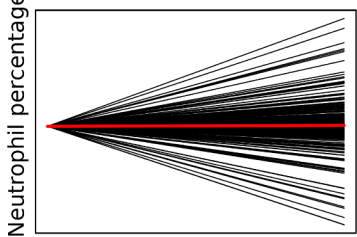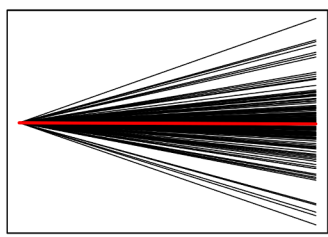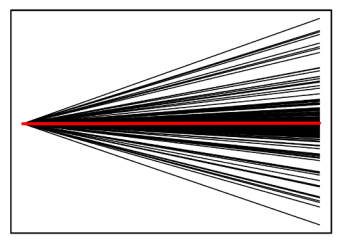

Time

Mycophenolate

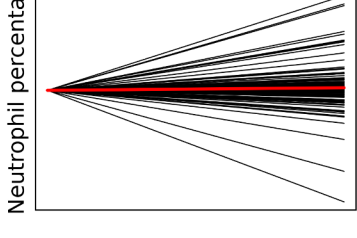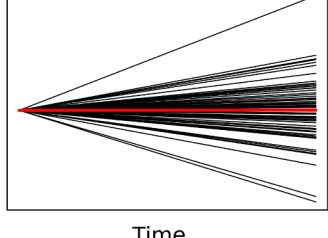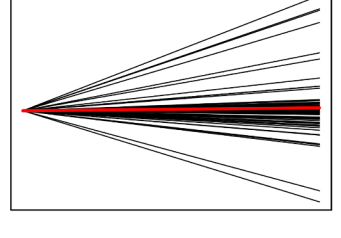

Time

Nonsteroidal anti-inflammatory drug

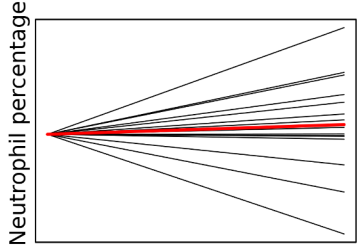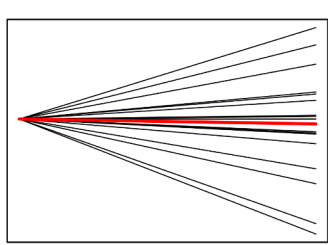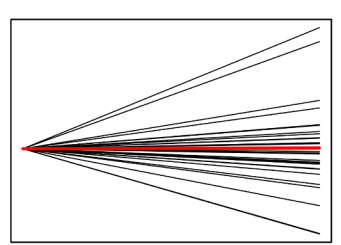

Time

Oral Steroids

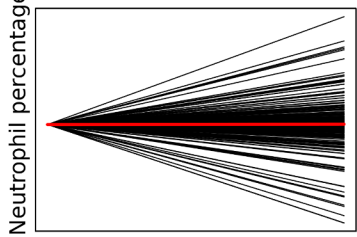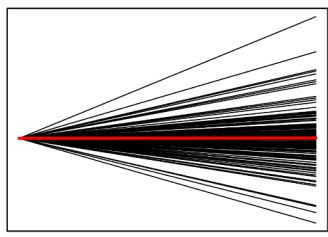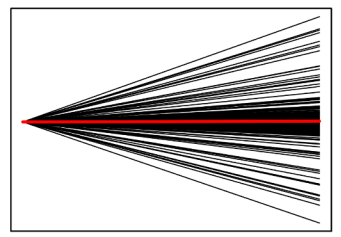

Time

Steroids IV category

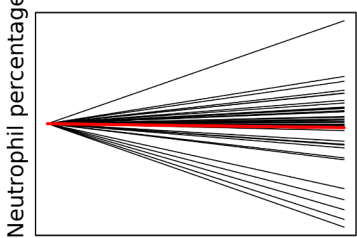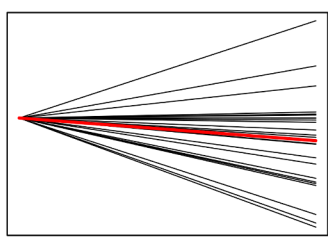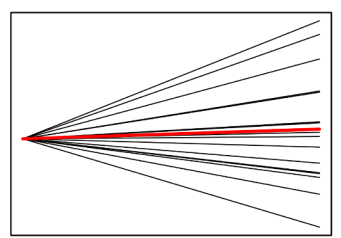

Time



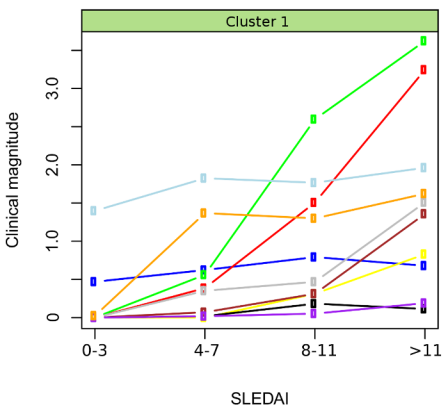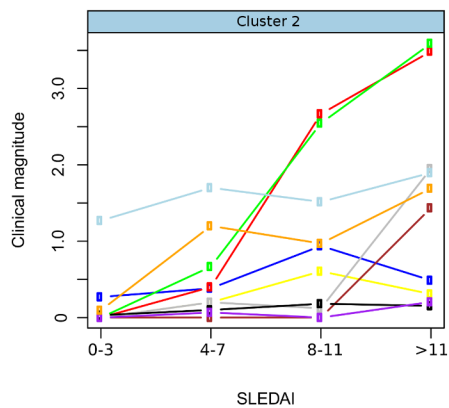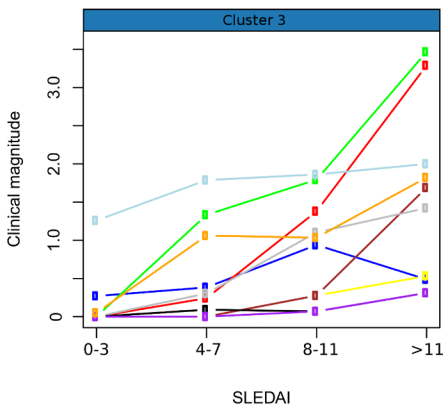

- Proteinuria
- Hematuria
- Increased DNA binding
- Low Complement
- Urinary casts
- Pyuria
- Arthritis
- MDG
- Mucosal ulcers

A

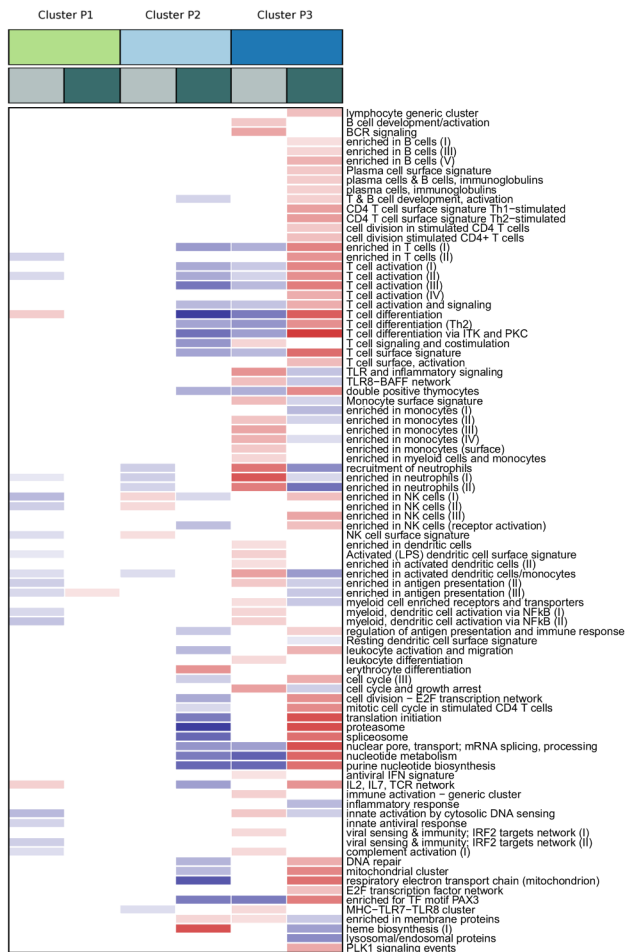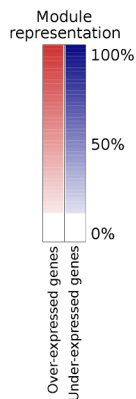

B

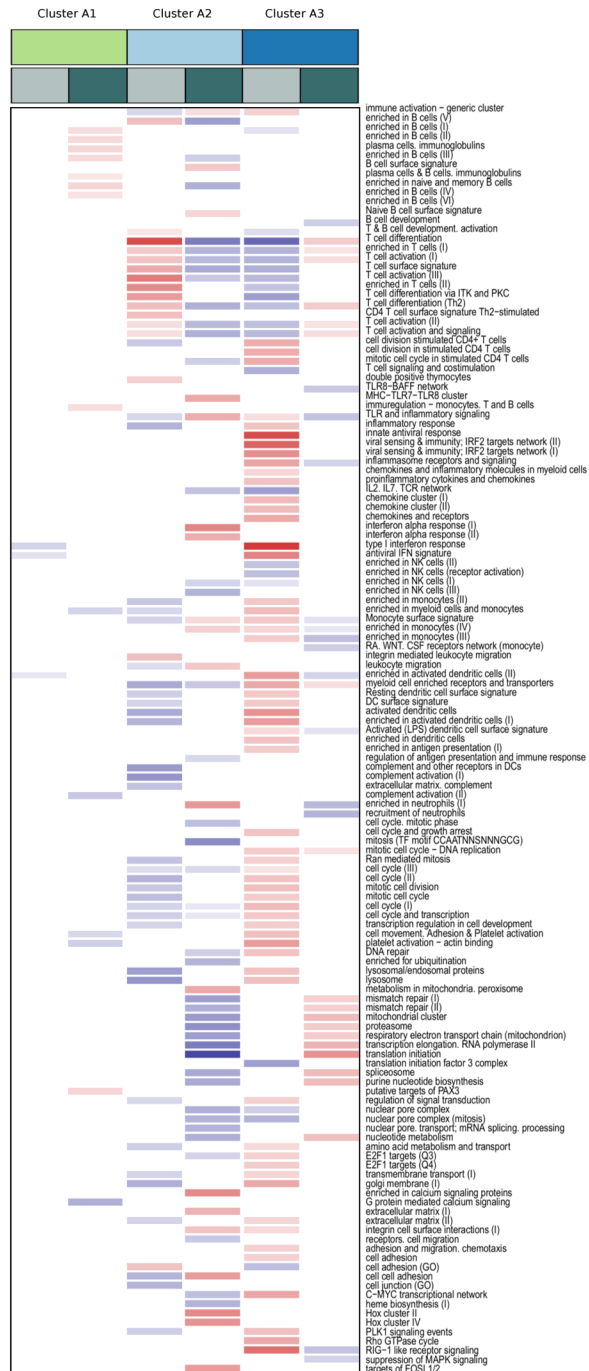

Supplement: NIHMS1716271-supplement-SupplementaryMaterial.pdf [file NIHMS1716271-supplement-SupplementaryMaterial.pdf]
